# Supplementary material for: LTA4H extensively associates with mRNAs and lncRNAs indicative of its novel regulatory targets
Source: PeerJ journal article supplement (doi:10.7717/peerj.14875), 2023-03-10
Supplement: Supplementary_files_2.zip [file Supplementary_files_2.zip]

A 3x8 grid of nucleotide bases (A, U, C, G) in various colors (green, red, blue, yellow) representing a sequence.

|   |   |   |   |   |   |   |   |
|---|---|---|---|---|---|---|---|
| A | U | C | G | A | A | G | A |
| G | G | U | G | C | C | U | G |
| C | A | A | U | U | G | A | U |
