# Supplementary material for: LTA4H extensively associates with mRNAs and lncRNAs indicative of its novel regulatory targets
Source: PeerJ journal article supplement (doi:10.7717/peerj.14875), 2023-03-10
Supplement: Supplementary_files_2.zip [file Supplementary_files_2.zip]

GGUAG



The image shows a DNA double helix segment with the sequence GGUAG. The top strand is composed of five nucleotides: two Guanine (G) bases in orange, one Uracil (U) base in red, one Adenine (A) base in green, and one Guanine (G) base in orange. The bottom strand is composed of five nucleotides: two Cytosine (C) bases in blue, one Guanine (G) base in green, one Uracil (U) base in red, and two Cytosine (C) bases in blue. The bases are connected by horizontal lines representing hydrogen bonds: three lines connect G to C, two lines connect U to A, and three lines connect G to C. The entire structure is set against a white background.
