# Supplementary material for: LTA4H extensively associates with mRNAs and lncRNAs indicative of its novel regulatory targets
Source: PeerJ journal article supplement (doi:10.7717/peerj.14875), 2023-03-10
Supplement: Supplementary_files_2.zip [file Supplementary_files_2.zip]

AUAAGGCGA  
GUAAGGCGA
