# Supplementary material for: LTA4H extensively associates with mRNAs and lncRNAs indicative of its novel regulatory targets
Source: PeerJ journal article supplement (doi:10.7717/peerj.14875), 2023-03-10
Supplement: Supplementary_files_2.zip [file Supplementary_files_2.zip]

A 3x10 grid of nucleotide bases (U, C, A, G) in various colors (red, blue, green, orange) representing a sequence.

|   |   |   |   |   |   |   |   |   |   |
|---|---|---|---|---|---|---|---|---|---|
| U | C | U | C | U | C | U | C | U | C |
| C | G | C | A | C | U | C | A | A | U |
| A | A | A | G | C | U | A | G | G | U |
