# Supplementary material for: LTA4H extensively associates with mRNAs and lncRNAs indicative of its novel regulatory targets
Source: PeerJ journal article supplement (doi:10.7717/peerj.14875), 2023-03-10
Supplement: Supplementary_files_2.zip [file Supplementary_files_2.zip]

A large graphic featuring the word "GUGU" repeated three times. The letters are thick and stylized. The "G"s are yellow, and the "U"s are red. There are small green and blue decorative elements at the base of some letters.
