# Supplementary material for: LTA4H extensively associates with mRNAs and lncRNAs indicative of its novel regulatory targets
Source: PeerJ journal article supplement (doi:10.7717/peerj.14875), 2023-03-10
Supplement: Supplementary_files_2.zip [file Supplementary_files_2.zip]

GGGGAAGAAGAU

The image displays a sequence of nine nucleotide bases: G, C, G, G, A, A, G, A, U. Each base is represented by a large, bold, colored letter. Below each base is a smaller, multi-colored representation of its complementary base, forming a double-stranded structure. The colors used are orange for G, blue for C, green for A, and red for U. The complementary bases are shown in a similar color scheme: C (blue), G (orange), U (red), and A (green). The sequence is arranged horizontally, with the bases G, C, G, G, A, A, G, A, U in the top row and their complements C, G, C, C, U, U, C, U, A in the bottom row.
