# Supplementary material for: LTA4H extensively associates with mRNAs and lncRNAs indicative of its novel regulatory targets
Source: PeerJ journal article supplement (doi:10.7717/peerj.14875), 2023-03-10
Supplement: Supplementary_files_2.zip [file Supplementary_files_2.zip]

CUAAC

The logo features the acronym 'CUAAC' in large, bold, sans-serif capital letters. The 'C' and 'A' are blue, the 'U' is red, and the second 'A' is green. Below the letters are five stylized, overlapping rings. From left to right, the rings are: a green ring, an orange ring, a red ring, a blue ring, and a green ring. The rings are arranged in a way that they appear to be stacked or overlapping, with the green ring on the left being the topmost, and the blue ring in the middle being the bottommost.
