# Supplementary material for: LTA4H extensively associates with mRNAs and lncRNAs indicative of its novel regulatory targets
Source: PeerJ journal article supplement (doi:10.7717/peerj.14875), 2023-03-10
Supplement: Supplementary_files_2.zip [file Supplementary_files_2.zip]

CCGGCAUCCGAG



The image displays a DNA double helix structure. The top strand is composed of the following nucleotides: C (blue), G (orange), G (orange), C (blue), A (green), U (red), C (blue), G (orange), A (green), and G (orange). The bottom strand is composed of the following nucleotides: G (orange), A (green), A (green), G (orange), U (blue), C (orange), G (green), U (red), C (blue), and A (green). The strands are connected by horizontal lines representing base pairs: C-A, G-A, G-A, C-G, A-U, U-C, C-G, G-C, A-U, and G-A.
