# Supplementary figures and images for: LTA4H extensively associates with mRNAs and lncRNAs indicative of its novel regulatory targets
Source: PeerJ journal article supplement (doi:10.7717/peerj.14875), 2023-03-10

CCCGCAGGAUC



Supplement: Supplementary_files_2.zip [file Supplementary_files_2.zip]

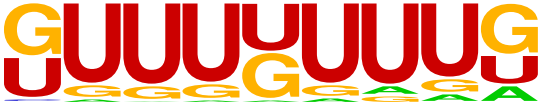

Supplement: Supplementary_files_2.zip [file Supplementary_files_2.zip]



CCAAGCCU

Supplement: Supplementary_files_2.zip [file Supplementary_files_2.zip]

Genomic Region

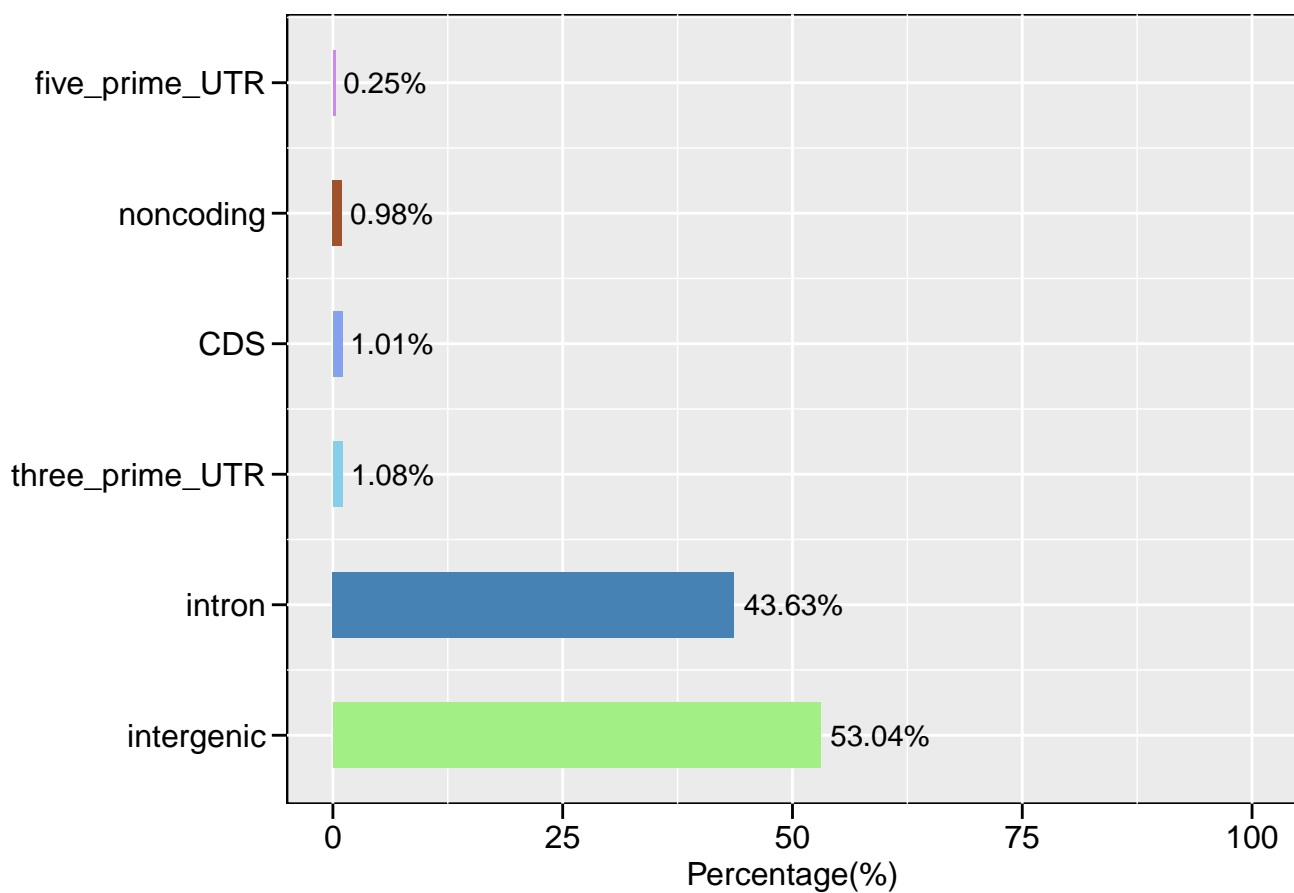

Supplement: Supplementary_files_2.zip [file Supplementary_files_2.zip]

AGCAGCAGC



Supplement: Supplementary_files_2.zip [file Supplementary_files_2.zip]

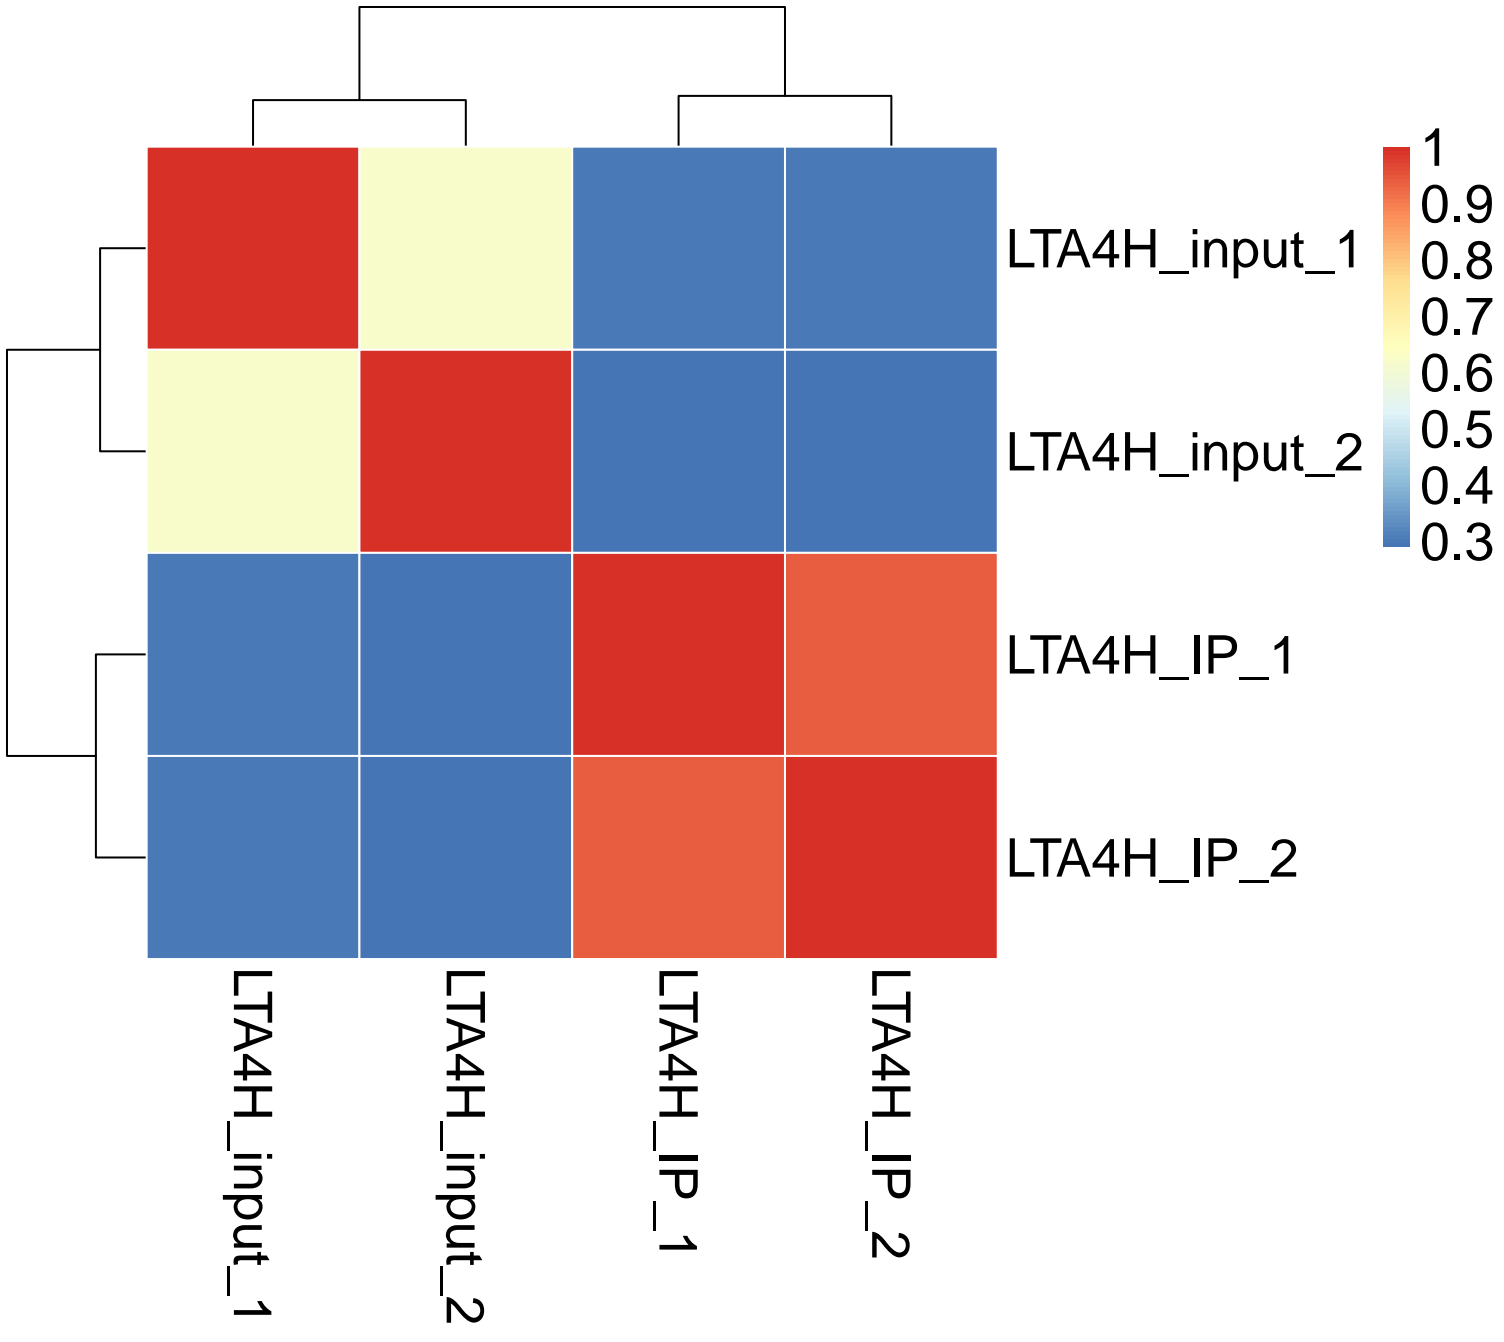

Supplement: Supplementary_files_2.zip [file Supplementary_files_2.zip]

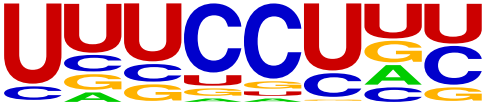

Supplement: Supplementary_files_2.zip [file Supplementary_files_2.zip]

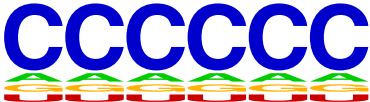

Supplement: Supplementary_files_2.zip [file Supplementary_files_2.zip]

AUCCGGGAAGA



Supplement: Supplementary_files_2.zip [file Supplementary_files_2.zip]

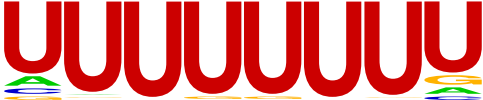

Supplement: Supplementary_files_2.zip [file Supplementary_files_2.zip]

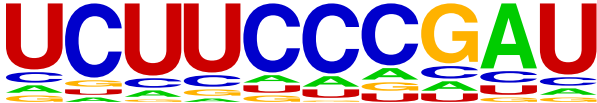

Supplement: Supplementary_files_2.zip [file Supplementary_files_2.zip]

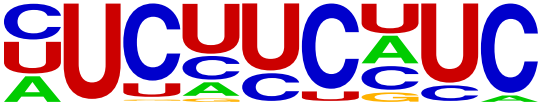

Supplement: Supplementary_files_2.zip [file Supplementary_files_2.zip]

C A A C A A C



Supplement: Supplementary_files_2.zip [file Supplementary_files_2.zip]
